# Supplementary material for: Facile fabrication of magnetic mesoporous silica via multifunctional surfactant self-assembly and oxidation
Source: Royal Society of Chemistry journal article supplement (doi:10.1039/c2jm16780h), 2012-01-01
Supplement: c2jm16780h.pdf [file c2jm16780h.pdf]

Electronic Supplementary Information (ESI)

**Facile fabrication of magnetic mesoporous silica via  
multifunctional surfactant self-assembly and oxidation**

**Chan Wang, Shengyang Tao\* and Changgong Meng**

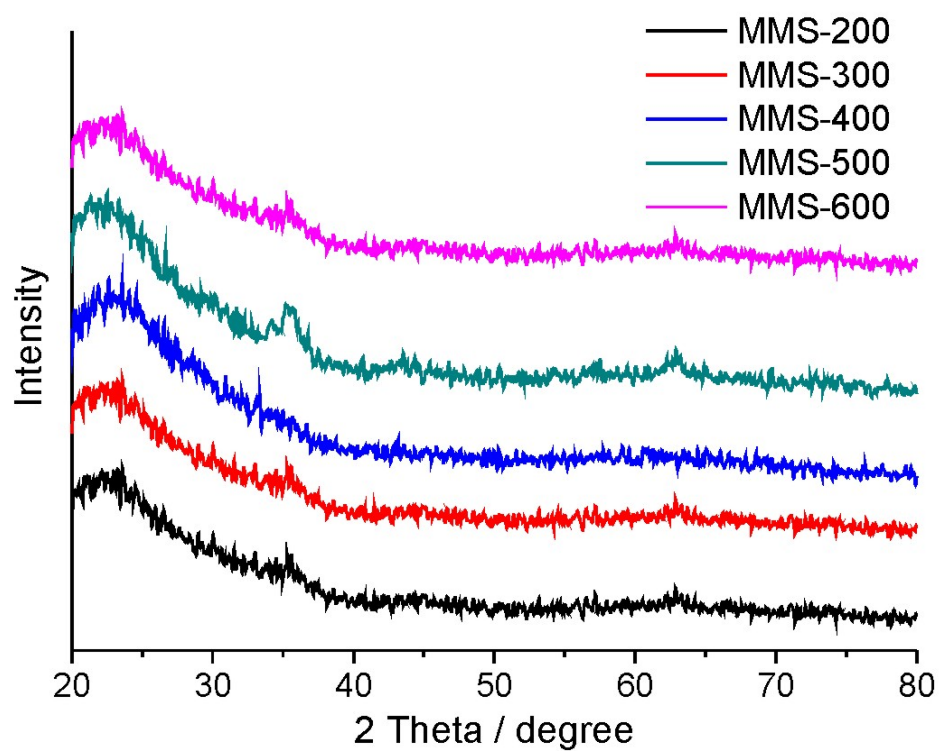

**Fig. S1** Wide-angle XRD patterns of as-synthesized MMS which were obtained by oxygenation at different temperatures.

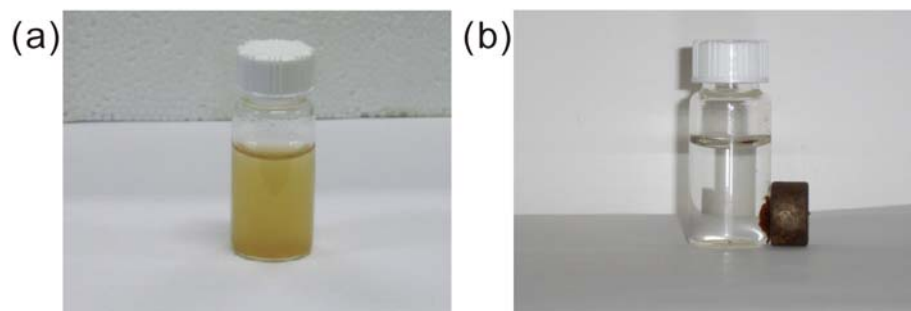

**Fig. S2** The photographs of (a) as-synthesized MMS-300 in aqueous solution and (b) after magnetic capture within 1 min..

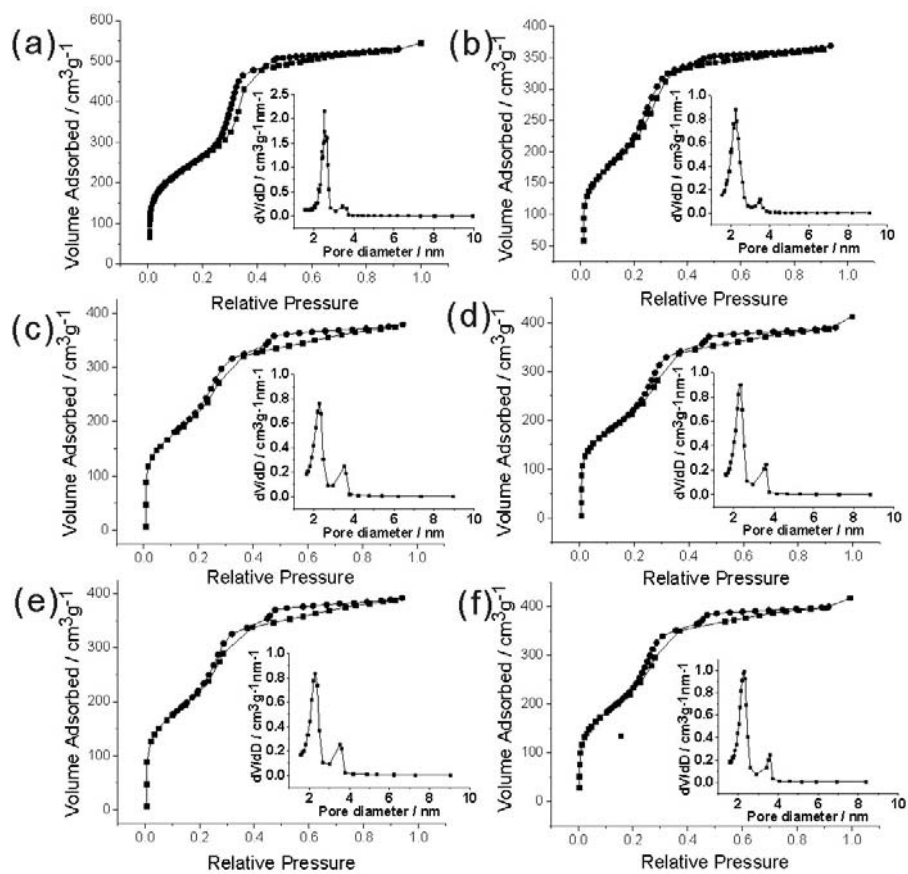

**Fig. S3** Nitrogen adsorption-desorption isotherms (inset: pore size distribution) of (a) as-synthesized MS after extraction with ammonium nitrate, and (b)-(f) after oxidation at 200 °C, 300 °C, 400 °C, 500 °C, 600 °C.

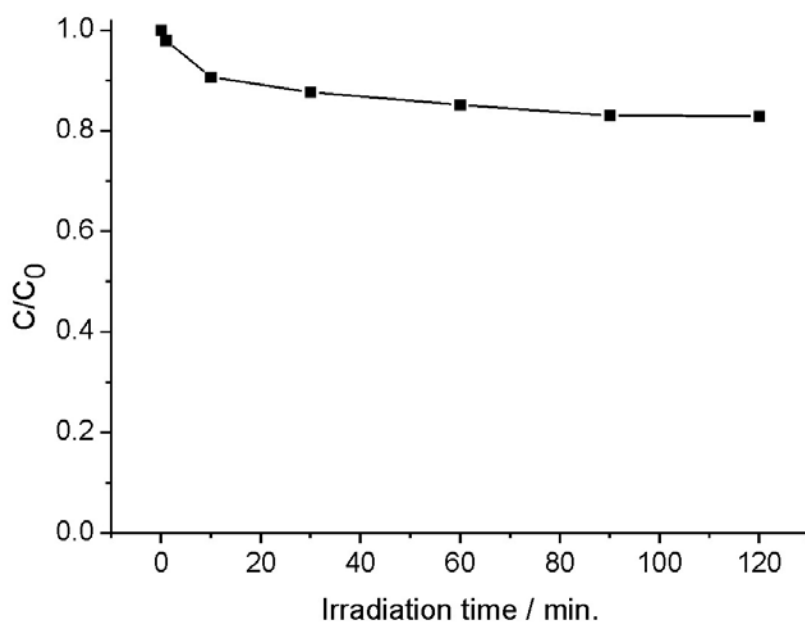

**Fig. S4** Degradation profile of Methylene blue solution (initial concentration 50 ppm, 10 mL) by  $H_2O_2$  (8 mM) in the absence of MMS under visible light irradiation (120 min.).

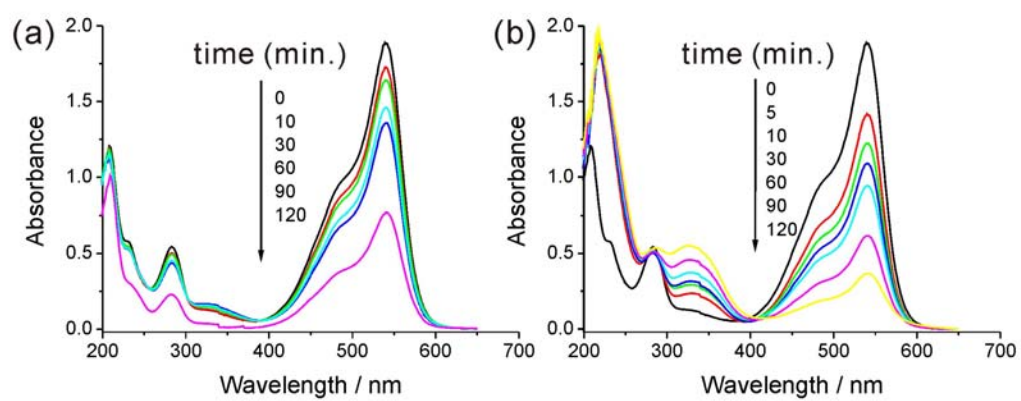

**Fig. S5** UV-vis absorption spectra of the Basic Fuchsin solution in the presence of MMS-300 during (a) the adsorption process and (b) the photocatalytic degradation process in the presence of  $H_2O_2$  under visible light irradiation.

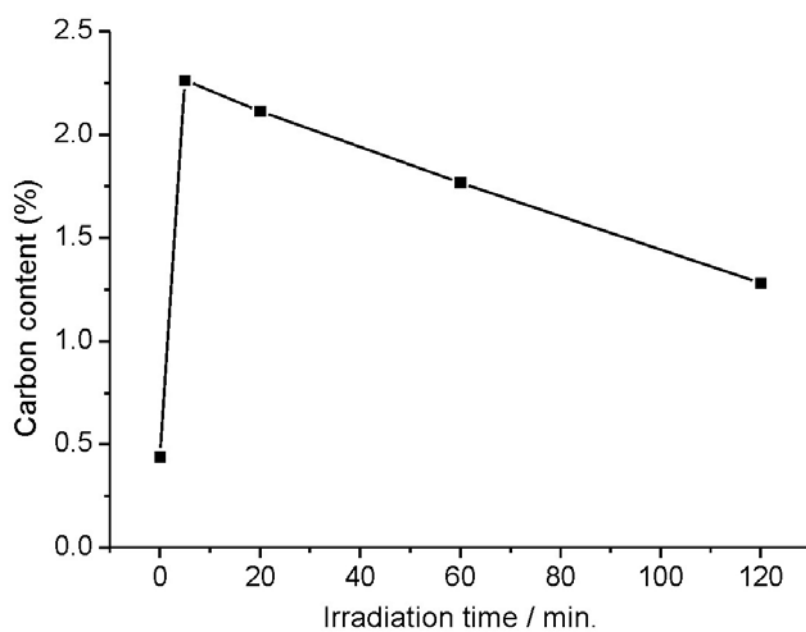

**Fig. S6** The changes of carbon content in the MMS catalysts at different reaction time during the course of photocatalytic degradation of Rhodamine B.
